# Supplementary material
Source: publisher figshare collection journal article supplement (https://gsapubs.figshare.com/ndownloader/files/22410459)
Supplement: Supplementary file 1 [file 22410459]

## Sheet: Sheet1
SUPPLEMENTAL TABLE 2. NAZCA SLAB CONSTRAINTS
Lat		Long		Depth			Comment
(°S)		(°W)		(km)
This Study (RF Based)
12.8797		77.036		65.6		RF subducted oceanic Moho depth
13.0542		76.8918		65.3		from sea level
13.2288		76.7476		70.8		Theoretical CCP-stack resolution
13.4033		76.6035		72.4		equal to 0.1 km
13.5778		76.4593		73
13.7524		76.3151		71.8
13.9269		76.1709		70.4
14.1014		76.0268		71.7
14.2759		75.8826		71.3
14.4505		75.7384		73.2
14.625		75.5942		71.6
14.7995		75.4501		72.3
12.9129		76.7138		59.8
13.0874		76.5696		59.5
13.262		76.4254		60.6
13.4365		76.2812		63
13.611		76.1371		63
13.7856		75.9929		64.1
13.9601		75.8487		68
14.1346		75.7045		67.6
14.3091		75.5604		67.2
14.4837		75.4162		64.9
14.6582		75.272		65.2
14.8327		75.1278		65.2
11.8989		77.2566		67.6
12.0735		77.1124		68.7
12.248		76.9683		68.9
12.4225		76.8241		69.7
12.7716		76.5357		60
12.9461		76.3916		59.1
13.1206		76.2474		60.6
13.2952		76.1032		62.8
13.4697		75.959		63.1
13.6442		75.8148		62.8
13.8188		75.6707		67.2
13.9933		75.5265		67.1
14.1678		75.3823		66.8
14.3423		75.2381		64.8
14.5169		75.094		65.1
14.6914		74.9498		65.2
11.7576		77.0786		70.7
11.9321		76.9344		71
12.1067		76.7902		71
12.2812		76.646		72
12.4557		76.5019		74.8
12.6302		76.3577		59.7
12.8048		76.2135		59
12.9793		76.0693		60.7
13.1538		75.9252		63.5
13.3284		75.781		63.3
13.5029		75.6368		62.4
13.6774		75.4926		66.1
13.852		75.3485		66.9
14.0265		75.2043		68
14.201		75.0601		64.9
14.3755		74.9159		64.9
14.5501		74.7717		65
11.6163		76.9005		71
11.7908		76.7563		74.4
11.9653		76.6122		76.3
12.1399		76.468		79
12.3144		76.3238		81.8
13.5361		75.3146		65.2
13.7106		75.1704		66.9
13.8852		75.0262		65.2
11.4749		76.7225		72.9
11.6495		76.5783		76.7
11.824		76.4341		77.3
11.9985		76.29		79.3
12.1731		76.1458		81.2
13.2202		75.2807		65.4
13.3948		75.1365		65.2
13.5693		74.9924		66.9
13.7438		74.8482		65.5
11.3336		76.5444		98.9
11.5081		76.4003		102.1
11.6827		76.2561		100.3
11.8572		76.1119		101.3
12.0317		75.9677		94.9
12.2063		75.8236		94.3
12.3808		75.6794		88.2
12.5553		75.5352		79.6
12.7298		75.391		67.3
12.9044		75.2469		66.6
13.0789		75.1027		65.7
13.2534		74.9585		69.4
13.428		74.8143		69.1
13.6025		74.6702		71.2
13.777		74.526		79.6
11.1923		76.3664		106.9
11.3668		76.2222		106.1
11.5413		76.078		106.9
11.7159		75.9339		103.5
11.8904		75.7897		96.7
12.0649		75.6455		95.4
12.2394		75.5013		90.3
12.414		75.3572		81
12.5885		75.213		66.5
12.763		75.0688		67.1
12.9376		74.9246		66.6
13.1121		74.7805		69.9
13.2866		74.6363		71.6
13.4612		74.4921		73.8
13.6357		74.3479		78.6
13.8102		74.2038		77.7
11.0509		76.1884		105.6
11.2255		76.0442		105.4
11.4		75.9		106.4
11.5745		75.7558		105.4
11.7491		75.6116		99.4
11.9236		75.4675		96.3
12.0981		75.3233		89.3
12.2726		75.1791		83.2
12.4472		75.0349		66.6
12.6217		74.8908		67
12.7962		74.7466		67.8
12.9708		74.6024		73.1
13.1453		74.4582		72.7
13.3198		74.3141		73.3
13.4944		74.1699		78
10.9096		76.0103		105.4
11.0841		75.8661		105.4
11.2587		75.722		106.4
11.4332		75.5778		106.9
11.6077		75.4336		99.8
11.7823		75.2894		95.7
11.9568		75.1453		90.4
12.1313		75.0011		86.9
12.3058		74.8569		87.5
12.4804		74.7127		87.5
12.6549		74.5686		86.7
12.8294		74.4244		71.8
13.004		74.2802		72.9
13.1785		74.136		72.9
13.353		73.9918		72.9
13.5276		73.8477		63.9
13.7021		73.7035		65.7
10.7683		75.8323		105.6
10.9428		75.6881		104.8
11.1173		75.5439		105
11.2919		75.3997		104.8
11.4664		75.2556		104.8
11.6409		75.1114		112.7
11.8155		74.9672		116.7
12.6881		74.2463		71.8
12.8626		74.1022		72.6
13.0372		73.958		72.4
13.2117		73.8138		74.1
13.3862		73.6696		64.9
13.5608		73.5255		67.4
10.6269		75.6542		106.4
10.8015		75.51		105.7
10.976		75.3659		107.3
11.1505		75.2217		105.4
11.3251		75.0775		107
13.2449		73.4916		64.7
13.4194		73.3474		70.3
10.4856		75.4762		106.7
10.6601		75.332		105.4
10.8347		75.1878		106.1
11.0092		75.0437		105
11.1837		74.8995		108.2
12.7545		73.6019		74.5
12.929		73.4577		74.1
13.1036		73.3135		73.2
13.2781		73.1694		70.1
10.3443		75.2981		106.7
10.5188		75.154		105.7
10.6933		75.0098		105.4
10.8679		74.8656		105.4
11.0424		74.7214		107.7
12.6132		73.4239		65.3
12.7877		73.2797		65.8
12.9622		73.1355		66
13.1368		72.9913		70.2
10.3775		74.9759		115
10.552		74.8317		115.3
10.7265		74.6876		114.7
12.4718		73.2458		68.4
12.6464		73.1016		72.2
12.8209		72.9575		74.1
12.9954		72.8133		74.8
12.505		72.9236		72.6
12.6796		72.7794		75.8
12.8541		72.6352		76.8
12.1892		72.8897		72
12.3637		72.7456		75.6
12.5382		72.6014		79.1
12.7128		72.4572		78
12.3969		72.4233		82.1
12.5714		72.2792		78.6
12.2556		72.2453		78.9
12.4301		72.1011		76.9
15.4448		75.4878		39.5
15.6008		75.3225		39.2
15.7569		75.1572		39.5
15.2833		75.3282		40
15.4393		75.1629		39.2
15.5953		74.9976		40
14.9657		75.3339		52.5
15.1217		75.1686		54
15.2778		75.0033		54
16.2138		74.0115		47.2
16.3698		73.8462		46.8
16.5258		73.6809		47
14.9602		75.009		53.5
15.1162		74.8437		54.4
16.0522		73.8518		46.7
16.2082		73.6865		47
16.3642		73.5212		50.9
16.5202		73.3559		53.3
16.6763		73.1906		52.9
14.7987		74.8493		74
14.9547		74.684		74
15.8907		73.6922		68.7
16.0467		73.5269		68.7
16.2027		73.3616		66.7
16.3587		73.1963		64.4
16.5147		73.031		64.2
14.6371		74.6897		76.5
14.7931		74.5244		78.4
14.9491		74.3591		79.9
15.1051		74.1938		81.7
16.0411		73.202		98.8
16.1972		73.0367		98.8
14.4756		74.5301		79.9
14.6316		74.3648		81.1
14.7876		74.1995		82.5
14.9436		74.0342		83.4
16.5036		72.3811		94.4
14.314		74.3704		81.4
14.47		74.2051		81.9
14.626		74.0398		81.4
14.782		73.8745		84.1
14.938		73.7092		90.4
14.1525		74.2108		81.4
14.3085		74.0455		82.5
14.4645		73.8802		79.8
14.6205		73.7149		75.5
14.7765		73.5496		76.1
14.9325		73.3843		84.6
13.9909		74.0512		78.3
14.1469		73.8859		78.2
14.3029		73.7206		75.4
14.4589		73.5553		71.8
14.6149		73.39		71.8
14.7709		73.2247		73
16.175		71.7369		122.1
16.331		71.5716		124.7
14.1414		73.5609		70.3
14.2974		73.3956		71.5
14.4534		73.2303		73.1
14.6094		73.065		74.2
14.7654		72.8997		79.7
14.9214		72.7344		92.4
13.8238		73.5666		66.4
13.9798		73.4013		69.4
14.1358		73.236		70.9
14.2918		73.0707		71.8
14.4478		72.9054		73.9
14.6038		72.7401		79.4
14.7599		72.5748		94.3
13.6623		73.407		67.6
13.8183		73.2417		67.4
14.1303		72.9111		74.4
14.2863		72.7458		74.4
14.5983		72.4152		94.4
13.5007		73.2473		66.3
13.6567		73.082		64.8
13.9687		72.7514		75.2
14.1247		72.5861		74.5
13.3392		73.0877		67.2
13.4952		72.9224		77.6
13.6512		72.7571		80.2
13.8072		72.5918		82
13.3336		72.7628		81.6
13.4896		72.5975		82.7
13.6456		72.4322		83.1
13.8017		72.2669		84.7
13.9577		72.1016		85.6
14.1137		71.9363		88.7
14.2697		71.771		86.5
13.1721		72.6031		78.1
13.3281		72.4378		82.8
13.4841		72.2725		82.3
13.6401		72.1072		83.3
13.7961		71.9419		83.1
14.1081		71.6113		79.2
14.2641		71.446		91.5
14.4201		71.2807		90.6
13.0105		72.4435		80.4
13.1665		72.2782		79
13.3226		72.1129		80.4
13.4786		71.9476		83.6
13.6346		71.7823		83.7
12.849		72.2839		79.1
13.005		72.1186		81.2
13.161		71.9533		83.7
13.317		71.788		85.1
13.473		71.6227		82
13.629		71.4574		80.4
12.6874		72.1242		80.7
12.8435		71.9589		94.1
12.9995		71.7936		91.8
13.1555		71.6283		91.1
13.3115		71.463		90.2
12.5259		71.9646		75.3
12.6819		71.7993		93.3
12.8379		71.634		91.9
12.9939		71.4687		91.1
13.1499		71.3034		90.7
12.5204		71.6397		93.2
12.6764		71.4744		92.1
12.8324		71.3091		91.2
12.9884		71.1438		90.3
This Study (Earthquake Based)
15.1107		74.5187		73.1		Wadati-Benioff zone (subducted
15.2667		74.3534		74.9		Moho equivalent?) depth from
15.4227		74.1881		76.6		sea level
15.5787		74.0228		75		Value rounded to nearest 0.1 km
15.7347		73.8575		72.8		to match RF results
15.2611		74.0285		84.7
15.4171		73.8632		86.9
15.5731		73.6979		89.1
15.7291		73.5326		91.2
15.8851		73.3673		93.3
15.0996		73.8688		85.5
15.2556		73.7035		89.7
15.4116		73.5382		94.1
15.5676		73.3729		97.8
15.7236		73.2076		99.3
15.8796		73.0423		98.1
16.0356		72.877		96.5
16.1916		72.7117		95.6
16.3476		72.5464		94.4
15.094		73.5439		93.7
15.25		73.3786		97.4
15.406		73.2133		101.4
15.562		73.048		105.1
15.7181		72.8827		108.7
15.8741		72.7174		111.5
16.0301		72.5521		111.5
16.1861		72.3868		100.3
15.0885		73.219		90.6
15.2445		73.0537		97.3
15.4005		72.8884		103.6
15.5565		72.7231		110
15.7125		72.5578		115.7
15.8685		72.3925		116.3
16.0245		72.2272		116
16.1805		72.0619		115.7
16.3365		71.8966		107.5
16.4925		71.7313		99.4
14.9269		73.0593		82.5
15.0829		72.894		91.7
15.239		72.7287		100.6
15.395		72.5634		109.9
15.551		72.3981		118.6
15.707		72.2328		122.4
15.863		72.0675		126.2
16.019		71.9022		127.9
15.0774		72.5691		100.4
15.2334		72.4038		107.4
15.3894		72.2385		114.7
15.5454		72.0732		122
15.7014		71.9079		130.4
15.8574		71.7426		137.8
16.0134		71.5773		131.2
16.1694		71.412		124.9
14.9159		72.4095		100.6
15.0719		72.2442		108.6
15.2279		72.0789		116.6
15.3839		71.9136		124.7
15.5399		71.7483		132.7
15.6959		71.583		139.7
14.7543		72.2498		101.9
14.9103		72.0845		110.5
15.0663		71.9192		119.2
15.2223		71.7539		127.8
15.3783		71.5886		136.4
15.5343		71.4233		145
14.2808		72.4208		81.5
14.4368		72.2555		88
14.5928		72.0902		96.3
14.7488		71.9249		103.7
14.9048		71.7596		114.4
15.0608		71.5943		125
15.2168		71.429		135.6
15.3728		71.2637		146.8
15.5288		71.0984		158.4
15.6848		70.9331		170.1
13.9632		72.4265		81.5
14.1192		72.2612		82.2
14.2752		72.0959		82.7
14.5872		71.7653		103.3
14.7432		71.6		114
14.8992		71.4347		126.1
15.0552		71.2694		139.9
15.2112		71.1041		151.5
15.3672		70.9388		164.2
14.5817		71.4403		101.8
14.7377		71.275		119.7
14.8937		71.1097		132.8
15.0497		70.9444		148
15.2057		70.7791		164.2
15.3617		70.6138		178.8
14.5761		71.1154		117.2
14.7321		70.9501		133
14.8881		70.7848		148
Scire et al., 2016
8		71		660		P-wave tomography center of slab
8.5		70.9		660		high velocity anomaly below
9		70.75		660		sea level
9.5		70.65		660
10		70.5		660
10.5		70.35		660
11		70.25		660
11.5		70		660
12		69.75		660
12.5		69.5		660
13		69.2		660
13.5		68.25		660
14		66.75		660
14		65.5		660
14.5		65		660
15		64.65		660
15.5		64.5		660
16		64.5		660
16.5		64.3		660
17		64.15		660
17.5		63.9		660
18		63.75		660
18.5		63.5		660
19		63.35		660
19.5		63.25		660
20		63.25		660
8		71.4		605
8.5		71.25		605
9		71.2		605
9.5		71.1		605
10		71		605
10.5		70.85		605
11		70.75		605
11.5		70.5		605
12		70.25		605
12.5		70		605
13		69.75		605
13.5		69		605
14		67.75		605
14.5		66.5		605
14.5		65.5		605
15		65		605
15.5		64.75		605
16		64.75		605
16.5		64.65		605
17		64.5		605
17.5		64.25		605
18		64		605
18.5		63.85		605
19		63.75		605
19.5		63.7		605
20		63.7		605
8		71.6		555
8.5		71.5		555
9		71.4		555
9.5		71.3		555
10		71.25		555
10.5		71.15		555
11		70.9		555
11.5		70.75		555
12		70.5		555
12.5		70.25		555
13		70		555
13.5		69.5		555
14		69		555
14.5		67.5		555
15		66.25		555
15		65.75		555
15.5		65.35		555
16		65.25		555
16.5		65.1		555
17		64.9		555
17.5		64.6		555
18		64.4		555
18.5		64.25		555
19		64.1		555
19.5		64.05		555
20		64		555
8		71.8		505
8.5		71.75		505
9		71.65		505
9.5		71.55		505
10		71.4		505
10.5		71.3		505
11		71.05		505
11.5		70.85		505
12		70.65		505
12.5		70.4		505
13		70.15		505
13.5		69.85		505
14		69.5		505
14.5		68.6		505
15		67.25		505
15.5		66		505
15.5		65.75		505
16		65.55		505
16.5		65.4		505
17		65.25		505
17.5		65		505
18		64.75		505
18.5		64.55		505
19		64.4		505
19.5		64.3		505
20		64.25		505
8		72		455
8.5		71.9		455
9		71.8		455
9.5		71.65		455
10		71.5		455
10.5		71.35		455
11		71.2		455
11.5		71		455
12		70.75		455
12.5		70.5		455
13		70.3		455
13.5		70		455
14		69.75		455
14.5		69		455
15		68		455
15.5		67		455
16		66		455
16.5		65.75		455
17		65.55		455
17.5		65.35		455
18		65.1		455
18.5		64.9		455
19		64.75		455
19.5		64.65		455
20		64.5		455
8		72.15		410
8.5		72.15		410
9		72		410
9.5		71.8		410
10		71.6		410
10.5		71.45		410
11		71.3		410
11.5		71.1		410
12		70.8		410
12.5		70.6		410
13		70.4		410
13.5		70.2		410
14		69.85		410
14.5		69.3		410
15		68.5		410
15.5		67.6		410
16		66.75		410
16.5		66.25		410
17		66		410
17.5		65.75		410
18		65.5		410
18.5		65.25		410
19		65.1		410
19.5		64.9		410
20		64.75		410
8		72.75		365
8.5		72.65		365
9		72.4		365
9.5		72.1		365
10		71.7		365
10.5		71.55		365
11		71.4		365
11.5		71.2		365
12		70.85		365
12.5		70.65		365
13		70.5		365
13.5		70.3		365
14.5		69.5		365
15		68.9		365
15.5		68.15		365
16		67.5		365
16.5		66.85		365
17		66.5		365
17.5		66.2		365
18		65.8		365
18.5		65.65		365
19		65.5		365
19.5		65.35		365
20		65.2		365
8		73.25		320
8.5		73.15		320
9		73		320
9.5		72.5		320
10		72		320
10.5		71.65		320
11		71.45		320
11.5		71.25		320
12		71		320
12.5		70.75		320
13		70.6		320
15		69.5		320
15.5		68.75		320
16		68		320
16.5		67.25		320
17		66.75		320
17.5		66.5		320
18		66.25		320
18.5		66.15		320
19		66		320
19.5		65.85		320
20		65.65		320
8		73.9		280
8.5		73.8		280
9		73.6		280
9.5		73.25		280
10		72.3		280
10.5		71.75		280
11		71.5		280
11.5		71.35		280
12		71.1		280
12.5		70.85		280
13		70.65		280
15		70		280
15.5		69.25		280
16		68.5		280
16.5		67.9		280
17		67.35		280
17.5		67		280
18		66.75		280
18.5		66.6		280
19		66.4		280
19.5		66.25		280
20		66.1		280
8		74.05		240
8.5		74.05		240
9		73.95		240
9.5		73.5		240
10		72.5		240
10.5		72		240
11		71.6		240
11.5		71.45		240
12		71.15		240
12.5		70.9		240
15		70.1		240
15.5		69.75		240
16		69		240
16.5		68.5		240
17		68.1		240
17.5		67.6		240
18		67.25		240
18.5		67.1		240
19		66.9		240
19.5		66.75		240
20		66.65		240
8		74.2		200
8.5		74.2		200
9		74.2		200
9.5		73.75		200
10		72.75		200
10.5		72.15		200
11		71.7		200
11.5		71.5		200
15		70.5		200
15.5		70.5		200
16		70		200
16.5		69.35		200
17		68.8		200
17.5		68.25		200
18		67.9		200
18.5		67.65		200
19		67.5		200
19.5		67.35		200
20		67.2		200
8		74.4		165
8.5		74.4		165
9		74.4		165
9.5		74.2		165
10		73		165
10.5		72.3		165
11		71.75		165
11.5		71.6		165
12		71.4		165
16.5		70.75		165
17		70		165
17.5		69.25		165
18		68.5		165
18.5		68.2		165
19		68		165
19.5		67.85		165
20		67.75		165
8		74.85		130
8.5		74.75		130
9		74.6		130
9.5		74.5		130
10		74.5		130
10.25		74		130
10.25		73.5		130
10.5		73		130
11		72.25		130
11.5		71.9		130
12		71.65		130
17		70.7		130
17.5		69.9		130
18		69.25		130
18.5		68.9		130
19		68.75		130
19.5		68.5		130
20		68.35		130
8		78.5		95
8.5		78.3		95
9		78.05		95
9.5		77.8		95
10		77.55		95
10.5		77.3		95
11		77		95
11.5		74.5		95
11		74		95
10.5		73.3		95
11		72.5		95
11.5		72.2		95
12		71.85		95
17		71		95
17.5		70.4		95
18		69.85		95
18.5		69.6		95
19		69.4		95
19.5		69.25		95
20		69.1		95
8		79.5		60
8.5		79.25		60
9		79		60
9.5		78.75		60
10		78.5		60
10.5		78.25		60
11		77.95		60
11.5		77.5		60
17		71.8		60
17.5		71		60
18		70.55		60
18.5		70.3		60
19		70.1		60
19.5		70		60
20		69.9		60
13		71		130
13.5		70.9		130
14		70.9		130
13.5		70.75		165
14		70.6		165
14.5		70.75		165
Hayes et al., 2012
8		81.36		3.4052		Best-fit surface for depth to top of
8		80.96		9.78122		subducting oceanic crust
8		80.94		10.096
8		80.3		19.9602
8		80.28		20.3182
8		79.86		29.7271
8		79.84		30.2736
8		79.52		39.9034
8		79.5		40.5481
8		79.22		49.8352
8.5		81.1		5.74057
8.5		80.82		9.90141
8.5		80.8		10.1597
8.5		80.1		19.7291
8.5		80.08		20.1073
8.5		79.68		29.7352
8.5		79.66		30.2969
9		80.88		7.25898
9		80.64		9.94284
9		80.62		10.1423
9		79.9		19.7896
9		79.88		20.2052
9		79.48		29.7726
9		79.46		30.2968
9.5		80.64		7.21733
9.5		80.3		9.94828
9.5		80.28		10.1314
9.5		79.64		19.8441
9.5		79.62		20.2343
9.5		79.2		29.5456
9.5		79.18		30.0466
10		80.32		6.61206
10		80		9.77
10		79.98		10.0402
10		79.32		19.866
10		79.3		20.2613
10		78.94		29.4348
10		78.92		30.0995
10.5		80.02		7.35447
10.5		79.8		9.85493
10.5		79.78		10.0629
10.5		79.1		19.9313
10.5		79.08		20.4141
10.5		78.8		29.3423
10.5		78.78		30.1338
11		79.76		8.10512
11		79.54		9.86553
11		79.52		10.0374
11		78.94		19.5594
11		78.92		20.1456
11		78.66		29.4166
11		78.64		30.2255
11		78.42		39.5343
11		78.4		40.3947
11		78.18		49.5638
11.5		79.44		7.13687
11.5		79.14		9.7935
11.5		79.12		10.0613
11.5		78.68		19.9478
11.5		78.66		20.5437
11.5		78.38		29.4519
11.5		78.36		30.1042
11.5		78.04		39.9772
11.5		78.02		40.5279
12		79.06		5.85462
12		78.78		9.83393
12		78.76		10.1784
12		78.28		19.7621
12		78.26		20.1872
12		77.8		29.8377
12		77.78		30.284
12.5		78.74		6.30125
12.5		78.46		9.7429
12.5		78.44		10.0031
12.5		77.76		19.8459
12.5		77.74		20.1627
13		78.4		5.82485
13		77.98		9.83741
13		77.96		10.0538
13.5		78.02		4.94914
13.5		77.36		9.99645
13.5		77.34		10.2058
14		77.56		4.70029
14		77.02		9.9616
14		77		10.325
14.5		77.08		5.8395
14.5		76.78		9.96271
14.5		76.76		10.2876
15		76.6		6.81782
15		76.26		9.82405
15		76.24		10.0469
15.5		76.14		6.07978
15.5		75.8		9.8172
15.5		75.78		10.0733
16		75.62		6.46081
16		75.18		9.90882
16		75.16		10.1221
16		74.54		19.7904
16		74.52		20.1817
16.5		75.04		6.85658
16.5		74.74		9.97273
16.5		74.72		10.1989
16.5		74.06		19.7034
16.5		74.04		20.0705
17		74.4		8.31534
17		74.22		9.83338
17		74.2		10.0185
17		73.42		19.7975
17		73.4		20.1095
17		72.88		29.852
17		72.86		30.3072
17		72.48		39.9135
17		72.46		40.4526
17		72.12		49.6788
17.5		73.76		8.27206
17.5		73.58		9.90398
17.5		73.56		10.0928
17.5		72.8		19.7002
17.5		72.78		20.0319
17.5		72.26		29.7457
17.5		72.24		30.1536
17.5		71.78		39.7005
17.5		71.76		40.1014
17.5		71.32		49.7464
18		73.06		8.79351
18		72.96		9.79873
18		72.94		10.0034
18		72.12		19.9573
18		72.1		20.2715
18		71.56		29.7017
18		71.54		30.0924
18		71.14		39.4618
18		71.12		40.0307
18		70.84		49.2797
18.5		72.48		8.6445
18.5		72.36		9.81134
18.5		72.34		10.0166
18.5		71.62		19.7194
18.5		71.6		20.0352
18.5		71.12		29.732
18.5		71.1		30.2587
18.5		70.8		39.6965
18.5		70.78		40.4197
18.5		70.54		49.8286
19		72		9.49999
19		71.98		9.75311
19		71.96		10.0027
19		71.26		19.6532
19		71.24		20.0439
19		70.88		29.3542
19		70.86		30.0057
19		70.6		39.5079
19		70.58		40.3066
19		70.36		49.5476
19.5		71.64		9.58146
19.5		71.62		9.7968
19.5		71.6		10.0154
19.5		71.02		19.8595
19.5		71		20.3925
19.5		70.72		29.4722
19.5		70.7		30.2185
19.5		70.46		39.8801
19.5		70.44		40.7306
19.5		70.24		49.4338
20		71.42		9.08037
20		71.36		9.84476
20		71.34		10.1176
20		70.9		19.528
20		70.88		20.1431
20		70.62		29.3569
20		70.6		30.142
20		70.38		39.2265
20		70.36		40.0803
20		70.14		49.5293
8		67		700
